# Supplementary material for: Personalized identification and characterization of genome-wide gene expression differences between patient-matched intracranial and extracranial melanoma metastasis pairs
Source: Springer Nature journal article supplement (doi:10.1186/s40478-024-01764-5), 2024-04-24
Supplement: MOESM2 [file 27022564]

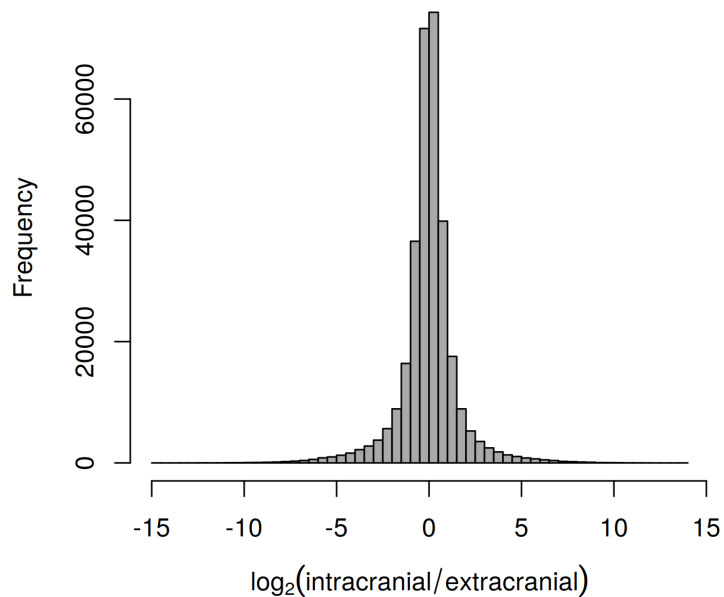

**Figure S2:** Histogram of gene expression  $\log_2$ -ratios across all patient-matched intra- vs. extracranial melanoma metastases. The majority of genes has unchanged expression levels with values about zero. Down- and up-regulated genes in intracranial metastases have expression levels clearly different from zero.
