# Supplementary material for: Personalized identification and characterization of genome-wide gene expression differences between patient-matched intracranial and extracranial melanoma metastasis pairs
Source: Springer Nature journal article supplement (doi:10.1186/s40478-024-01764-5), 2024-04-24
Supplement: MOESM3 [file 27022564]

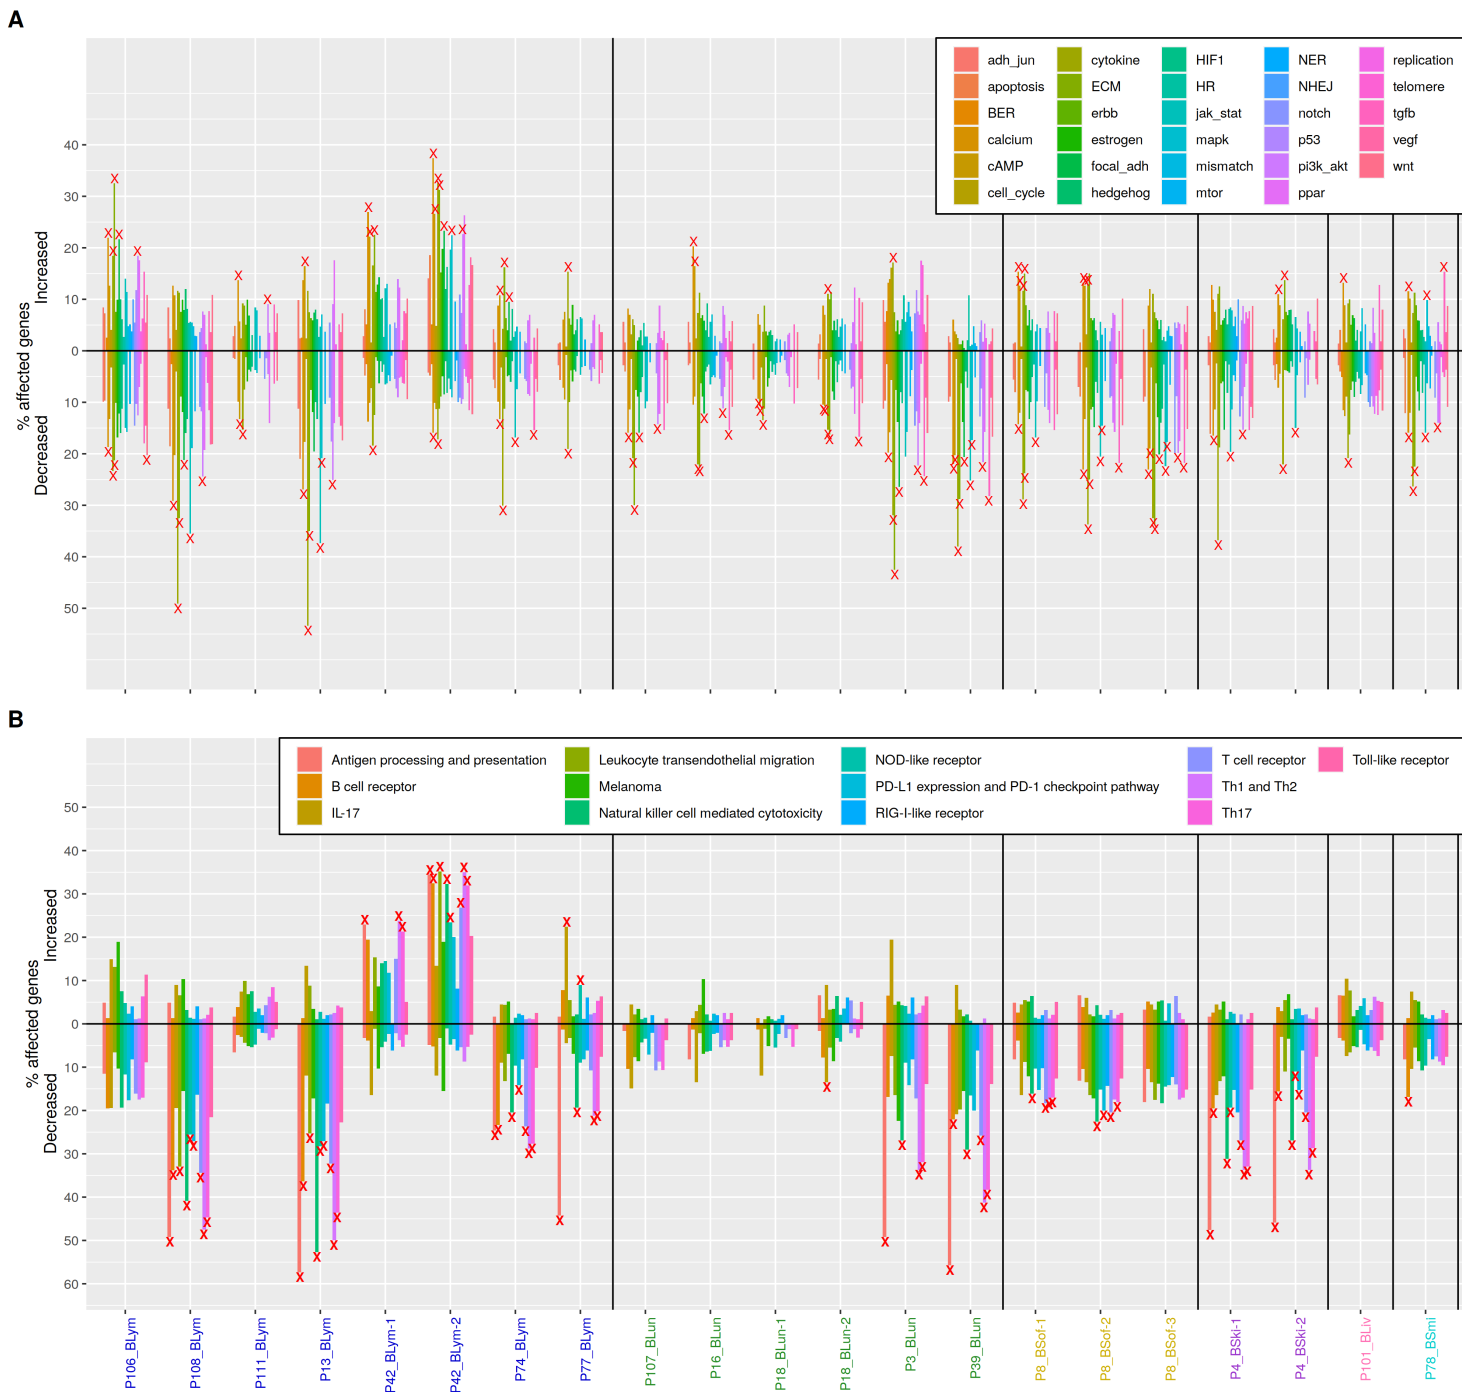

**Figure S3:** Signaling and immune pathway alterations for each patient-matched melanoma metastasis pair. A, Percentage of genes in each cancer-relevant signaling pathway that were either increased or decreased expressed in the intracranial metastasis compared to the corresponding extracranial metastasis of a patient-matched metastasis pair. B, Percentage of genes in each immune-relevant pathway that were either increased or decreased expressed in the intracranial metastasis compared to the corresponding extracranial metastasis of a patient-matched metastasis pair. Significant enrichment of decreased or increased expressed genes in pathways of subpanels A and B are marked with 'x' (FDR-adjusted p-value < 0.05).
